# Supplementary material for: Environmentally benign synthesis of fluorescent carbon nanodots using waste PET bottles: highly selective and sensitive detection of Pb2+ions in aqueous medium
Source: Royal Society of Chemistry journal article supplement (doi:10.1039/d1nj00961c), 2021-01-01
Supplement: d1nj00961c1.pdf [file d1nj00961c1.pdf]

**Electronic Supplementary Material**

**Environmentally benign synthesis of fluorescent carbon nanodots using waste PET bottle: Highly selective and sensitive detection of Pb<sup>2+</sup> ions in aqueous medium**

*Arnab Ghosh<sup>a</sup> and Gopal Das<sup>a,b</sup>*

*<sup>a</sup> Centre for the Environment, Indian Institute of Technology Guwahati, Assam, 781039, India*

*<sup>b</sup> Department of Chemistry, Indian Institute of Technology Guwahati, Assam, 781039, India*

E-mail: gdas@iitg.ac.in, Tel.: +91-361-258-2313; fax: +91-361-258-2349

### Calculation of quantum yield

The quantum yield (QY) of CDs was determined using quinine sulfate as the standard and calculated with following equation:

$$QY_x = QY_{\text{std}} (I_x / I_{\text{std}}) (A_{\text{std}} / A_x) (\eta_x^2 / \eta_{\text{std}}^2)$$

where the subscript “x” denotes CDs, the subscript “std” designates quinine sulfate, “QY” represents the quantum yield, “I” is the integrated PL intensity, “A” is the absorbance, and “ $\eta$ ” stands for the refractive index of the solvent. Quinine sulfate (QY: 54 %) was dissolved in 0.1 M H<sub>2</sub>SO<sub>4</sub> (refractive index: 1.33) and CDs were dissolved in water (refractive index: 1.33). The absorbance values of the respective solutions were kept below 0.10 at excitation wavelength so as to minimize the reabsorption effects.

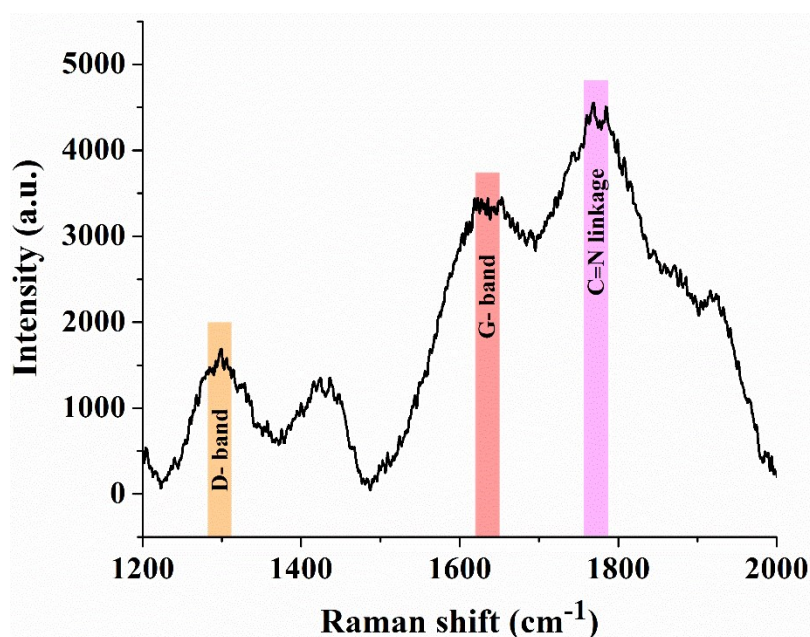

**Fig. S1.** Raman spectrum of the as prepared CDs.

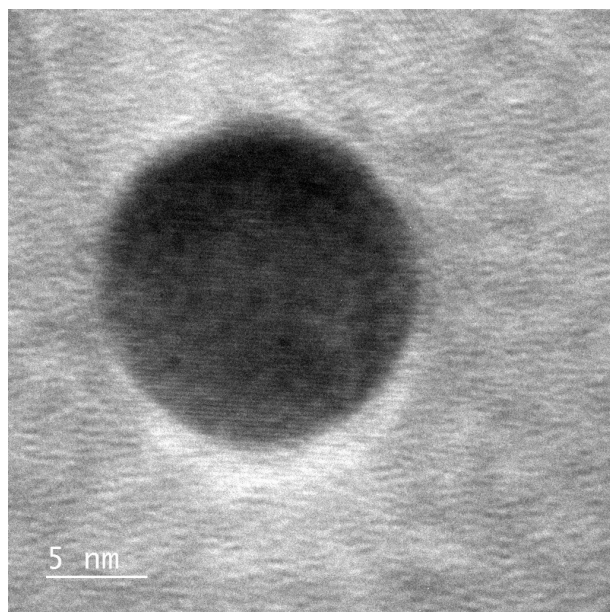

**Fig. S2.** HRTEM image of the synthesized carbon nanodot.

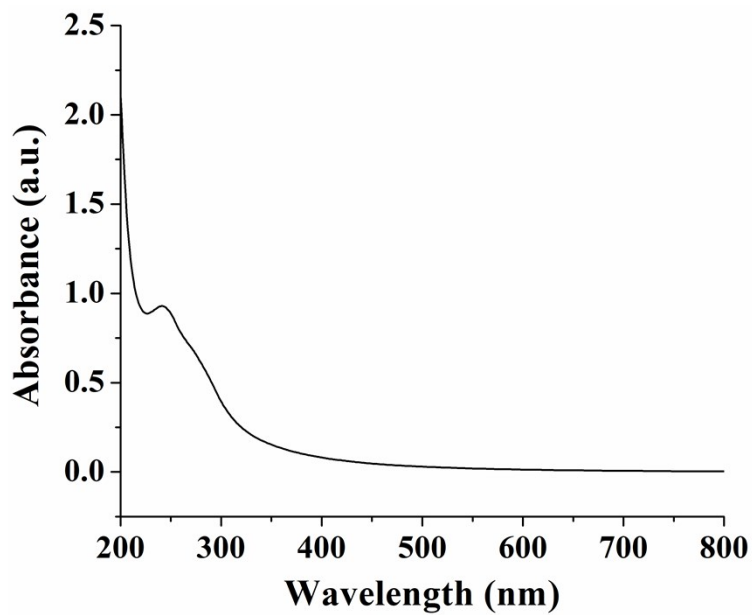

**Fig. S3.** UV-vis spectrum of the CD solution

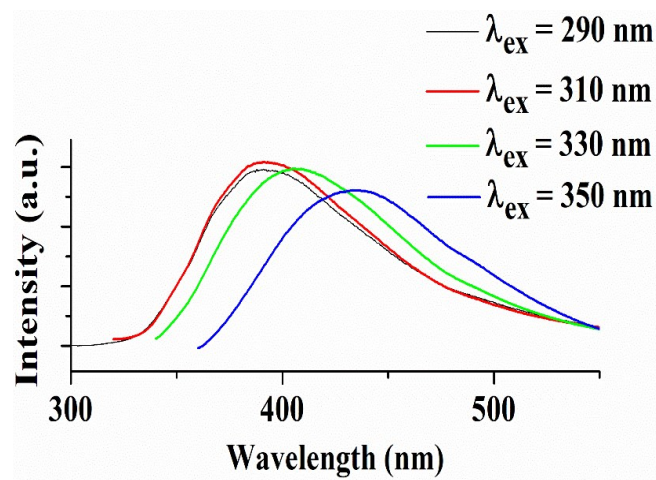

**Fig. S4.** Emission spectrum of the CDs at different excitation wavelength ( $\lambda_{ex}$ )

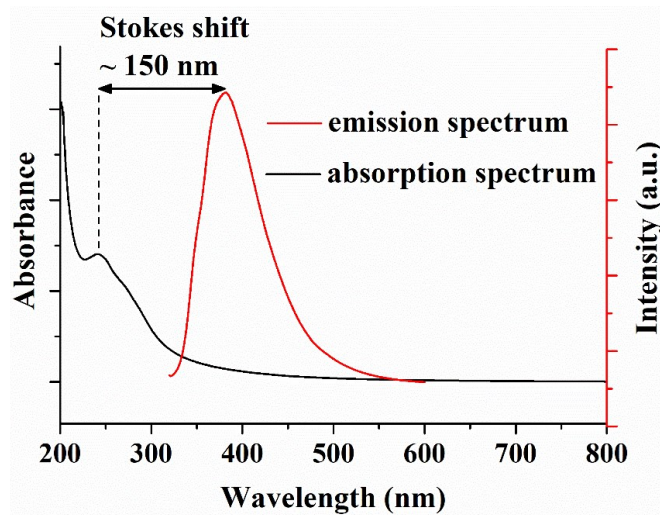

**Fig. S5.** Determination of Stokes shift from the maximum absorption and emission spectrum of the synthesized CDs

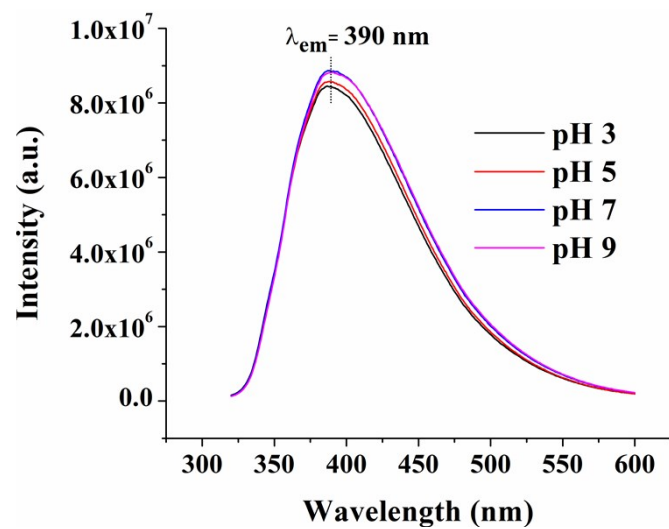

**Fig. S6.** Emission spectrum of the synthesized CDs at different solution Ph

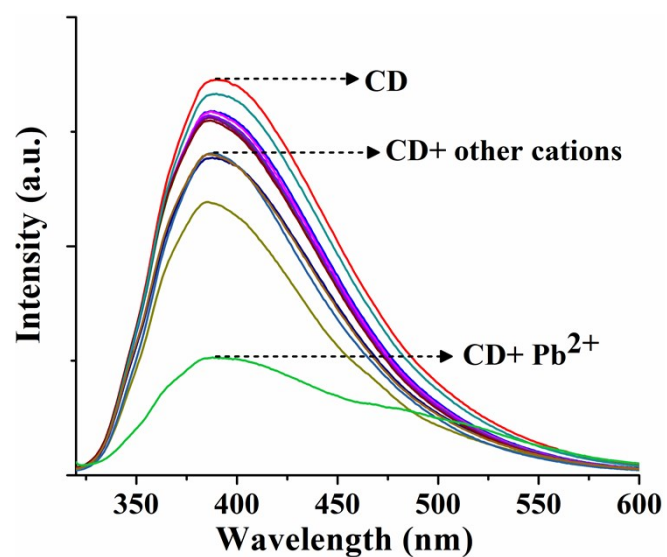

**Fig. S7.** Selectivity of  $Pb^{2+}$  over other cations in quenching of fluorescence intensity of an aqueous solution of CDs.

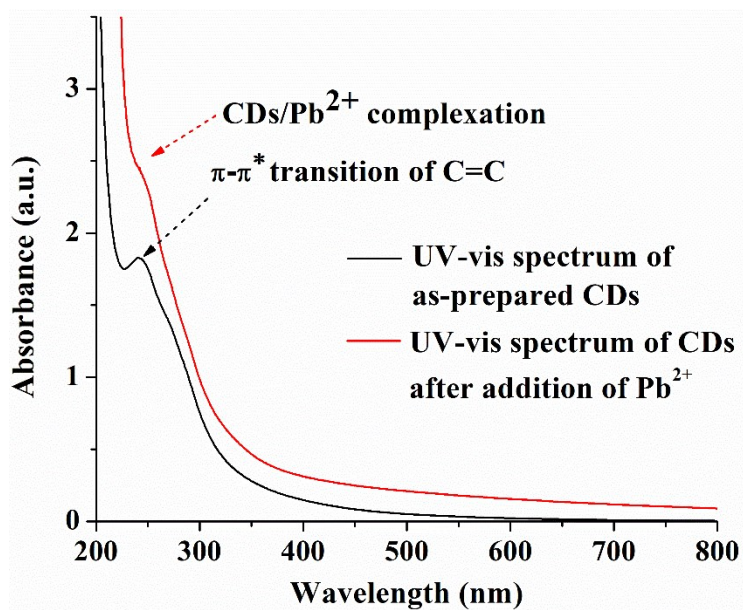

**Fig. S8.** UV-vis spectrum of the as-prepared CDs Vs UV-vis spectrum of CDs after addition 10  $\mu\text{M}$  of  $\text{Pb}^{2+}$  ions

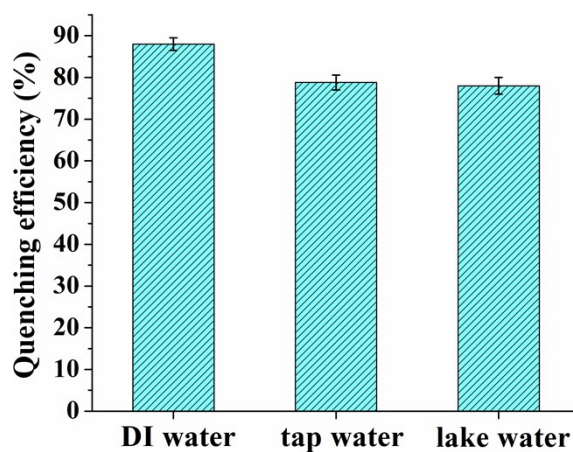

**Fig. S9.** Fluorescence quenching efficiency of different water samples spiked with  $\text{Pb}^{2+}$  ions
